# Supplementary material
Source: Springer Nature journal article supplement (https://www.springermedizin.de/resource/supplementary/12937_2010_294_MOESM3_ESM.pdf/25654804)

Prehypertensive to Hypertensive (n =15)

Normtensive (n=36)

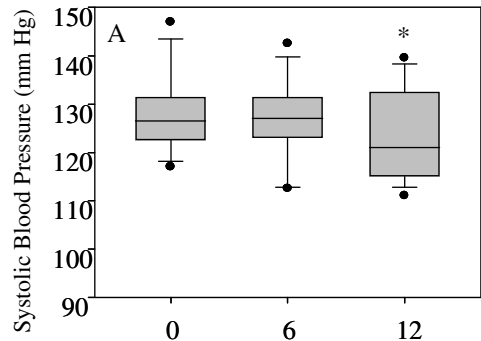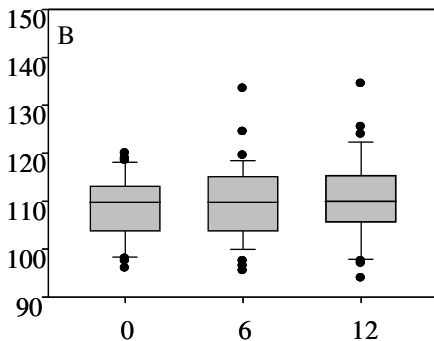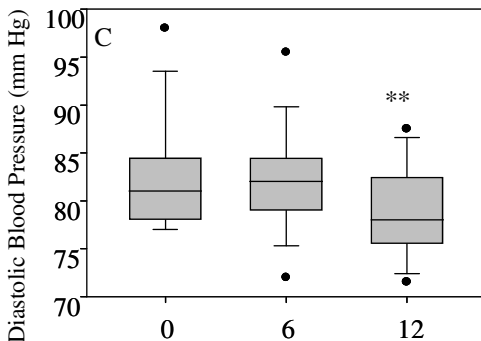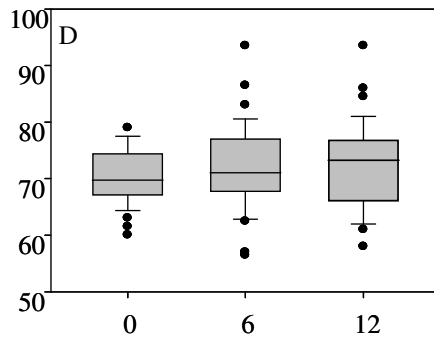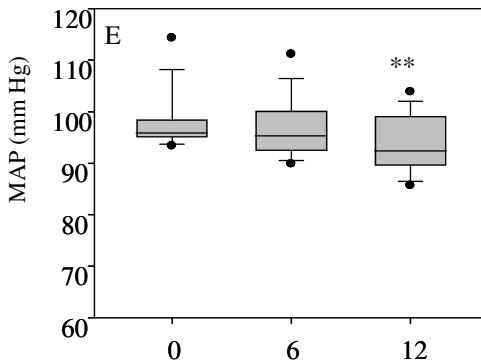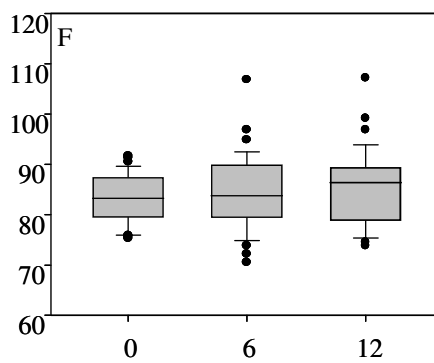

Time (weeks)

Supplement: MOESM3 [file 25654804]
